# Supplementary material for: Prognostic impact of C-reactive protein and alpha-fetoprotein in immunotherapy score in hepatocellular carcinoma patients treated with atezolizumab plus bevacizumab: A multicenter retrospective study
Source: Research Square preprint supplement (doi:10.21203/rs.3.rs-1318972/v1), 2022-02-15
Supplement: Supplementary file 1 [file 47c6358aa70186228df4cc58.xlsx]

## Sheet: Supplemental Table 1
Supplemental Table 1. Multivariate analyses of factors associated with PFS and OS
Variables		Hazard ratio (95% CI)	P-value
PFS anlaysis
Chronic liver disease	Viral infection	1.15 (0.82-1.61)	0.41
BCLC stage	stage C or D	1.40 (0.99-2.00)	0.06
CRAFITY score	0 points	1
	1 point	1.70 (1.17-2.49)	0.006
	2 points	3.04 (1.90-4.87)	<0.001
Treatment settings	Front line	1.02 (0.73-1.43)	0.91
Age	≥73 years	1.09 (0.77-1.54)	0.64
Sex	Female	0.51 (0.30-0.85)	0.01
OS anlaysis
Chronic liver disease	Viral infection	0.96 (0.56-1.68)	0.9
BCLC stage	stage C or D	1.14 (0.65-1.99)	0.66
CRAFITY score	0 points	1
	1 point	2.06 (1.03-4.12)	0.04
	2 points	5.04 (2.40-10.58)	<0.001
Treatment settings	Front line	0.98 (0.56-1.71)	0.93
Viral infection was defined as hepatitis B virus or hepatitis C virus infection
BCLC, Barcelona clinical liver cancer; CI, confidence interval; CRAFITY C-reactive protein and α-fetoprotein in immunotherapy; OS, overall survival; PFS, progression-free survival.
