# Supplementary material for: Prognostic impact of C-reactive protein and alpha-fetoprotein in immunotherapy score in hepatocellular carcinoma patients treated with atezolizumab plus bevacizumab: A multicenter retrospective study
Source: Research Square preprint supplement (doi:10.21203/rs.3.rs-1318972/v1), 2022-02-15
Supplement: Supplementary file 2 [file 6c6724712b60cf0d938066b3.xlsx]

## Sheet: Table 1
Table 1. Patient demographic
Variables	Overall patients (n=297)	CRAFITY 0 points (n=147)	CRAFITY 1-2 points (n=150)	p-value
Age, years	73.0 [68.0, 78.0]	73.0 [68.0, 77.5]	73.5 [67.0, 79.0]	0.5
Male, n (%)	243 (81.8)	122 (83.0)	121 (80.7)	0.65
PS, n (%)a				0.025
0	238 (80.1)	127 (86.4)	111 (74.0)
1	49 (16.5)	17 (11.6)	32 (21.3)
2	10 (3.4)	3 (2.0)	7 (4.7)
Body mass index, (kg/m2)	22.8 [20.7, 25.2]	23.5 [21.1, 26.1]	22.3 [20.3, 24.8]	0.014
Chronic Liver diseases, n (%)				0.94
HCV	97 (32.7)	46 (31.3)	51 (34.0)
HBV	49 (16.5)	24 (16.3)	25 (16.7)
Alcohol	57 (19.2)	30 (20.4)	27 (18.0)
Others	94 (31.6)	47 (32.0)	47 (31.3)
Total bilirubin (mg/dl)	0.70 [0.54, 1.00]	0.70 [0.57, 1.00]	0.70 [0.54, 1.00]	0.61
Albumin (g/dl)	3.77 [3.40, 4.10]	3.90 [3.60, 4.20]	3.60 [3.20, 3.90]	<0.001
Child-Pugh score, n (%)				<0.001
5	183 (61.6)	108 (73.5)	75 (50.0)
6	96 (32.3)	35 (23.8)	61 (40.7)
≥7	18 (6.1)	4 (2.7)	14 (9.3)
ALBI score	-2.43 [-2.70, -2.13]	-2.56 [-2.77, -2.27]	-2.29 [-2.61, -2.02]	<0.001
mALBI grade, n (%)				<0.001
1	115 (38.7)	70 (47.6)	45 (30.0)
2a	76 (25.6)	42 (28.6)	34 (22.7)
2b	104 (35.0)	35 (23.8)	69 (46.0)
3	2 (0.7)	0 (0.0)	2 (1.3)
Treatment settings, n (%)				0.002
Front line	169 (56.9)	97 (66.0)	72 (48.0)
Later line	128 (43.1)	50 (34.0)	78 (52.0)
BCLC stage, n (%)				0.038
Early stage	17 (5.7)	11 (7.5)	6 (4.0)
Intermediate stage	121 (40.7)	69 (46.9)	52 (34.7)
Advanced stage	155 (52.2)	65 (44.2)	90 (60.0)
Terminal stage	4 (1.3)	2 (1.4)	2 (1.3)
AFP≥100 ng/mL, n (%)	122 (41.1)	0 (0.0)	122 (81.3)	<0.001
DCP≥100 mAU/mL*, n (%)	198 (67.3)	78 (54.2)	120 (80.0)	<0.001
CRP (mg/dL)	0.30 [0.10, 0.86]	0.17 [0.06, 0.37]	0.72 [0.19, 1.79]	<0.001
CRP≥1.0 mg/dL	67 (22.6)	0 (0.0)	67 (44.7)	<0.001
CRAFITY score (point)				<0.001
0	147 (49.5)	147 (100.0)	0 (0.0)
1	111 (37.4)	0 (0.0)	111 (74.0)
2	39 (13.1)	0 (0.0)	39 (26.0)
Data are reported as the median [IQR] or number (percentage).
*Data were missing for three patients.
AFP, α-fetoprotein; ALBI, albumin-bilirubin; BCLC, Barcelona clinical liver cancer; CRP, C-reactive protein; CRAFITY, C-reactive protein and α-fetoprotein in immunotherapy; DCP, Des-gamma-carboxy prothrombin; HBV, hepatitis B virus; HCV, hepatitis C virus; mALBI, modified albumin-bilirubin; PS, performance status.

## Sheet: Table 2
Table 2. Confirmed radiological response rate according to CRAFITY score
	CRAFITY 0 points (n=119)	CRAFITY 1 point (n=101)	CRAFITY 2 points (n=37)	P-value
Radiological response, n (%)				0.2
CR	2 (1.7)	3 (3.0)	0 (0.0)
PR	28 (23.5)	24 (23.8)	8 (21.6)
SD	71 (59.7)	53 (52.5)	16 (43.2)
PD	18 (15.1)	21 (20.8)	13 (35.1)
Objective response rate (%)	30 (24.4)	27 (26.0)	8 (20.5)	0.8
Disease control rate (%)	101 (82.1)	80 (76.9)	24 (61.5)	0.029
The radiological response was assessed by Response Evaluation Criteria In Solid Tumors version 1.1.
CR, complete response; CRAFITY C-reactive protein and α-fetoprotein in immunotherapy; PD, progressive disease; PR, partial response; SD, stable disease.

## Sheet: Table 3
Table 3. Multivariate anlayses of factors associated with PFS and OS
Variables		Hazard ratio (95% CI)	P-value
PFS anlaysis
Chronic liver disease	Viral infection	1.17 (0.84-1.63)	0.36
BCLC stage	stage C or D	1.41 (0.99-2.00)	0.058
AFP	≥100 ng/mL	1.97 (1.40-2.77)	<0.001
CRP	≥1.0 mg/dL	1.51 (1.05-2.19)	0.028
Treatment settings	Front line	1.00 (0.72-1.40)	0.99
Age	≥73 year old	1.07 (0.76-1.52)	0.69
Sex	Female	0.50 (0.30-0.84)	0.009
OS anlaysis
Chronic liver disease	Viral infection	0.98 (0.57-1.70)	0.94
BCLC stage	stage C or D	1.14 (0.65-2.01)	0.64
AFP	≥100 ng/mL	2.74 (1.52-4.92)	<0.001
CRP	≥1.0 mg/dL	1.87 (1.06-3.31)	0.032
Treatment settings	Front line	0.96 (0.55-1.67)	0.88
Viral infection was defined as hepatitis B virus or hepatitis C virus infection
AFP, α-fetoprotein; BCLC, Barcelona clinical liver cancer; CI, confidence interval; CRP, C-reactive protein; OS, overall survival; PFS, progression-free survival.

## Sheet: Table 4
Table 4. Adverse events according to the CRAFITY score
		CRAFITY 0 points (n=147)	CRAFITY 1 point (n=111)	CRAFITY 2 points (n=39)	P-value
Diarrhea	Any	7 (4.8)	10 (9.0)	5 (12.8)	0.17
	Grade ≥3	1 (0.7)	1 (0.9)	1 (2.6)	0.57
Liver injury	Any	17 (11.6)	13 (11.7)	10 (25.6)	0.058
	Grade ≥3	3 (2.0)	3 (2.7)	4 (10.3)	0.036
Hypertension	Any	28 (19.0)	23 (20.7)	7 ( 17.9)	0.91
	Grade ≥3	6 (4.1)	5 (4.5)	3 (7.7)	0.634
Decreased appetite	Any	28 (19.0)	24 (21.6)	18 (46.2)	0.002
	Grade ≥3	7 (4.8)	4 (3.6)	1 (2.6)	0.79
Protein urea	Any	26 (17.7)	32 (28.8)	13 (33.3)	0.039
	Grade ≥3	10 (6.8)	9 (8.1)	7 (17.9)	0.087
Fever	Any	5 (3.4)	13 (11.7)	6 (15.4)	0.011
	Grade ≥3	2 (1.4)	1 (0.9)	1 (2.6)	0.74
Fatigue	Any	37 (25.2)	22 (19.8)	16 (41.0)	0.032
	Grade ≥3	4 (2.7)	1 (0.9)	0 (0.0)	0.36
Varices rupture	Any	0 (0.0)	0 (0.0)	0 (0.0)	NA
	Grade ≥3	2 (1.4)	1 (0.9)	0 (0.0)	0.36
Hepatic edema	Any	11 (7.5)	11 (9.9)	3 (7.7)	0.77
	Grade ≥3	1 (0.7)	4 (3.6)	2 (5.1)	0.146
CRAFITY, C-reactive protein and α-fetoprotein in immunotherapy; NA, not applicable.
